# Supplementary material
Source: PubMed Central journal article supplement (PMC2672507)
Supplement: 0901983106_0901983106SI.pdf [file 0901983106_0901983106SI.pdf]

# Supporting Information

Redd et al. 10.1073/pnas.0901983106

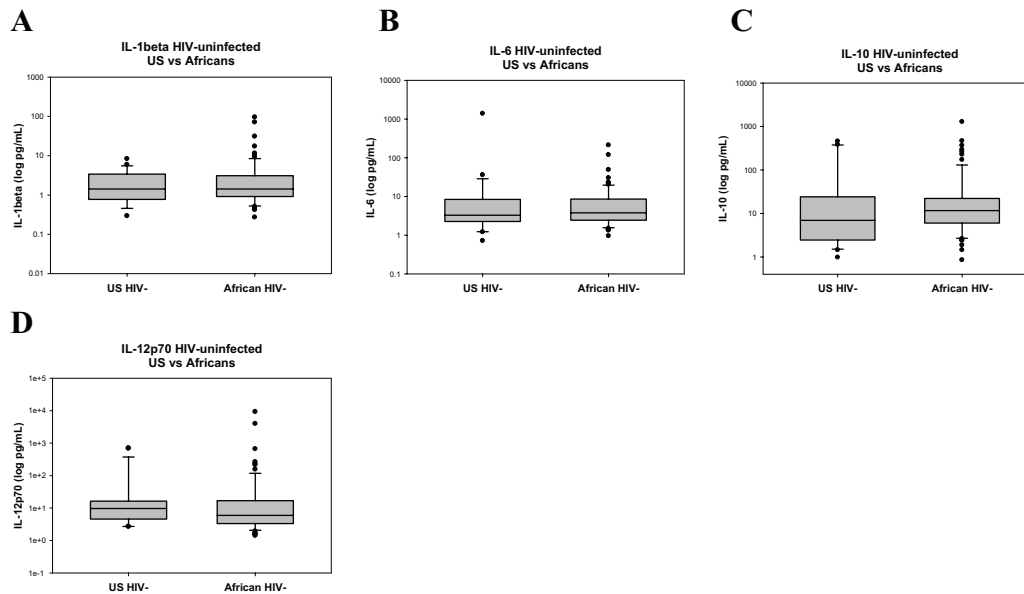

**Fig. S1.** Baseline circulating cytokine levels of uninfected U.S. and African subjects. Differences in baseline serum levels of IL-1 $\beta$  (A), IL-6 (B), IL-10 (C), and IL-12p70 (D) between HIV-negative U.S. individuals and uninfected African individuals are shown, with significance indicated where applicable ( $P < .05$ , Mann-Whitney rank-sum test).

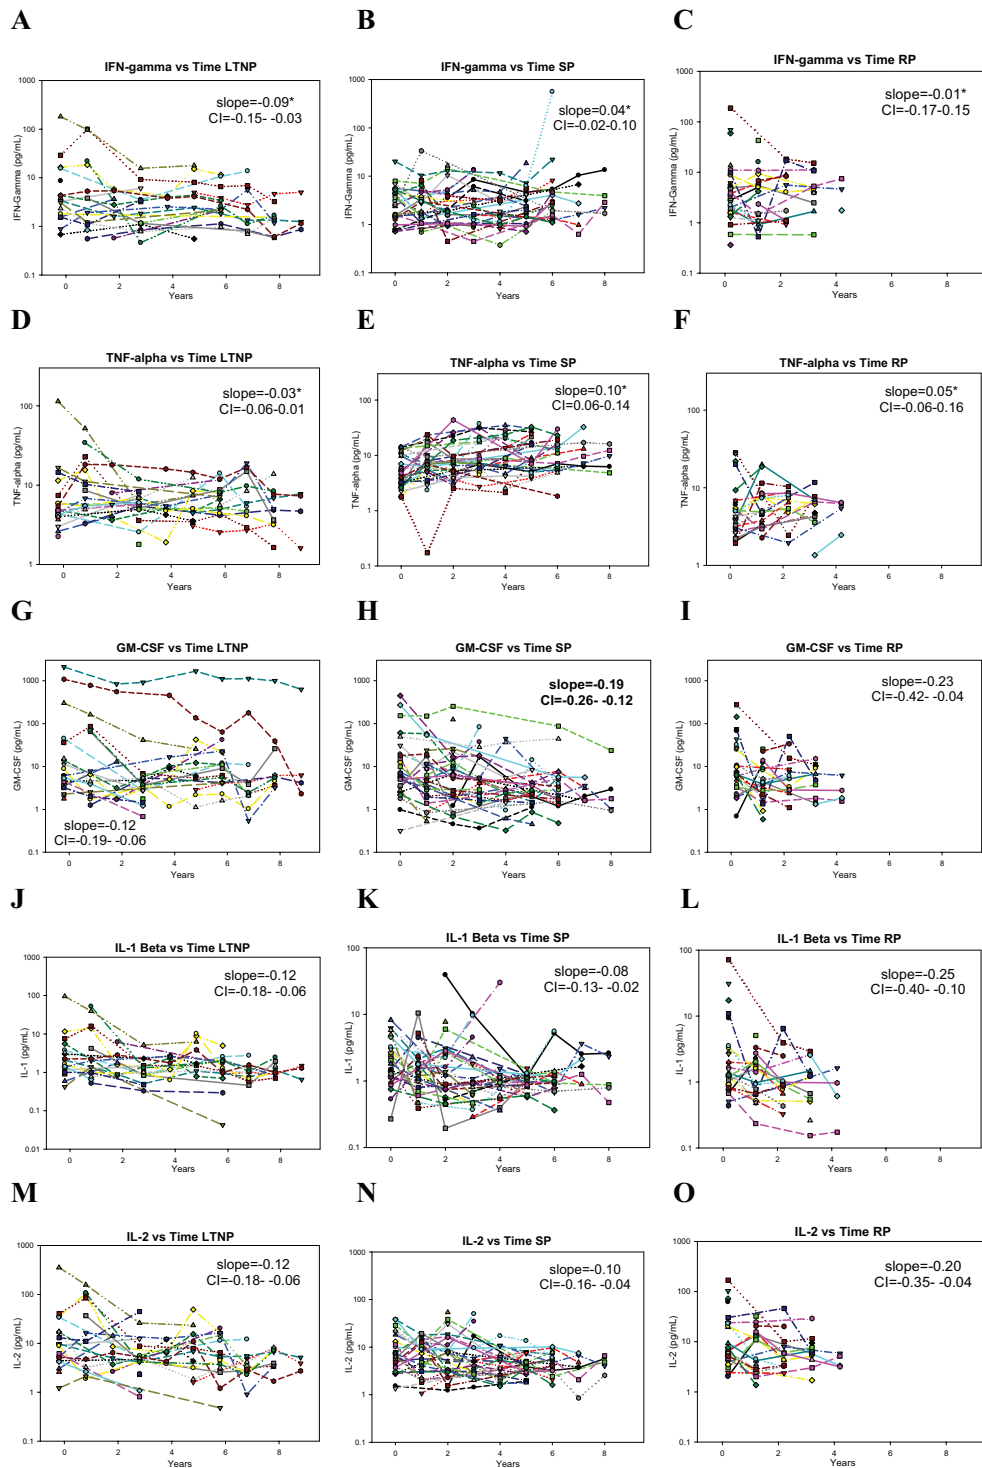

**Fig. S2.** African patient cytokine profiles according to progression groups. Levels of circulating cytokine levels are shown for the LTNP, SP, and RP groups for IFN- $\gamma$  (A–C), TNF- $\alpha$  (D–F), GM-CSF (G–I), IL-1 $\beta$  (J–L), IL-2 (M–O), IL-6 (P–R), IL-8 (S–U), IL-10 (V–Y), and IL-12 p70 (Z–BB) accordingly. Linear multilevel modeling fit slopes ( $r$ ) in the log scale of each group are shown with the 95% CI and significance noted by an asterisk ( $P < .01$ ).

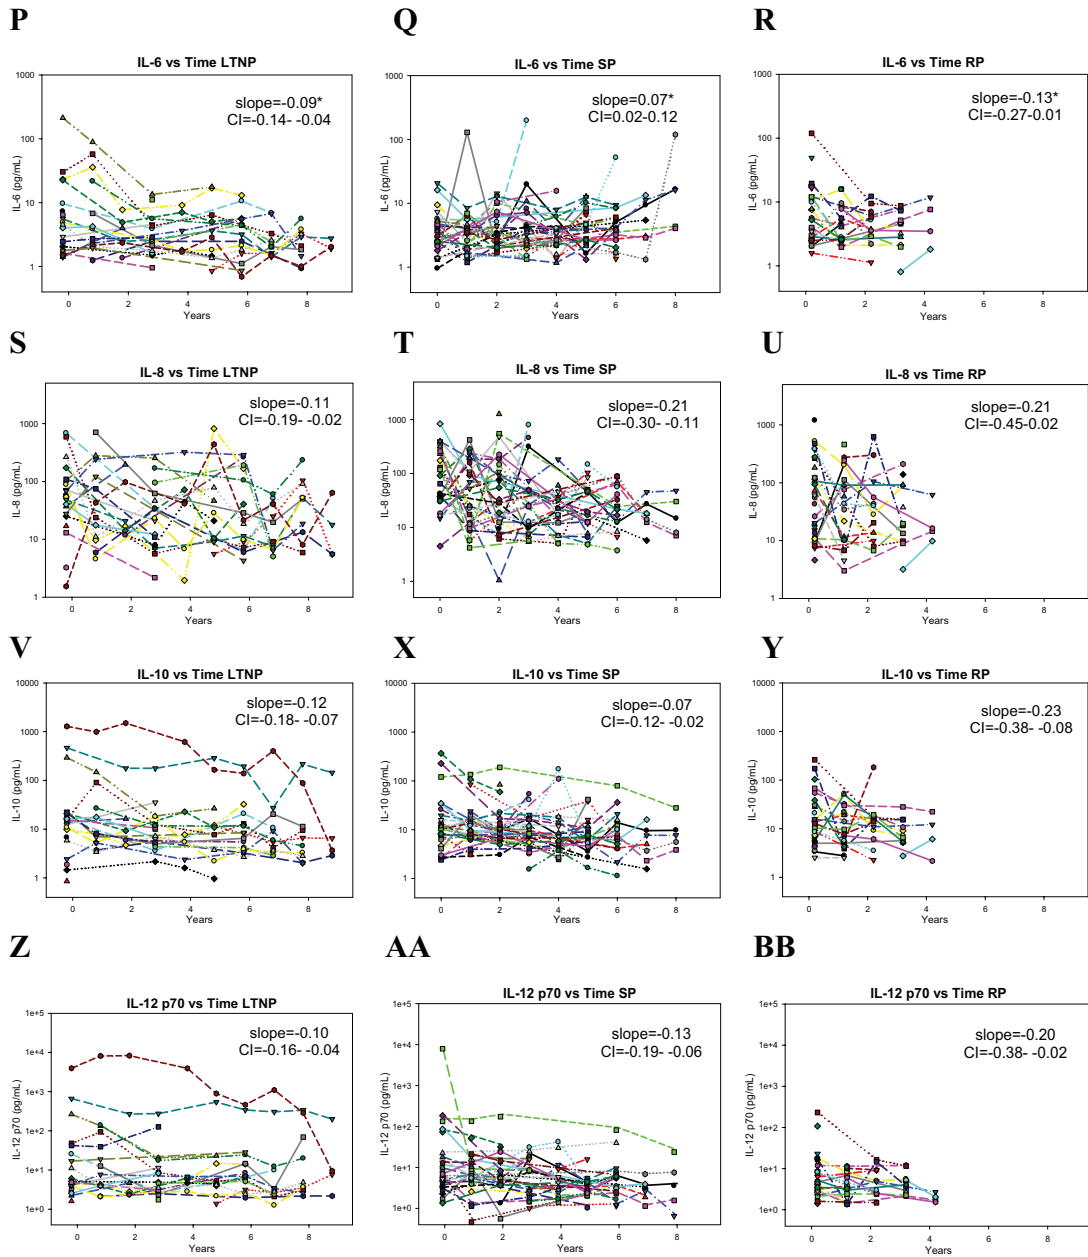

Fig. S2 (continued).

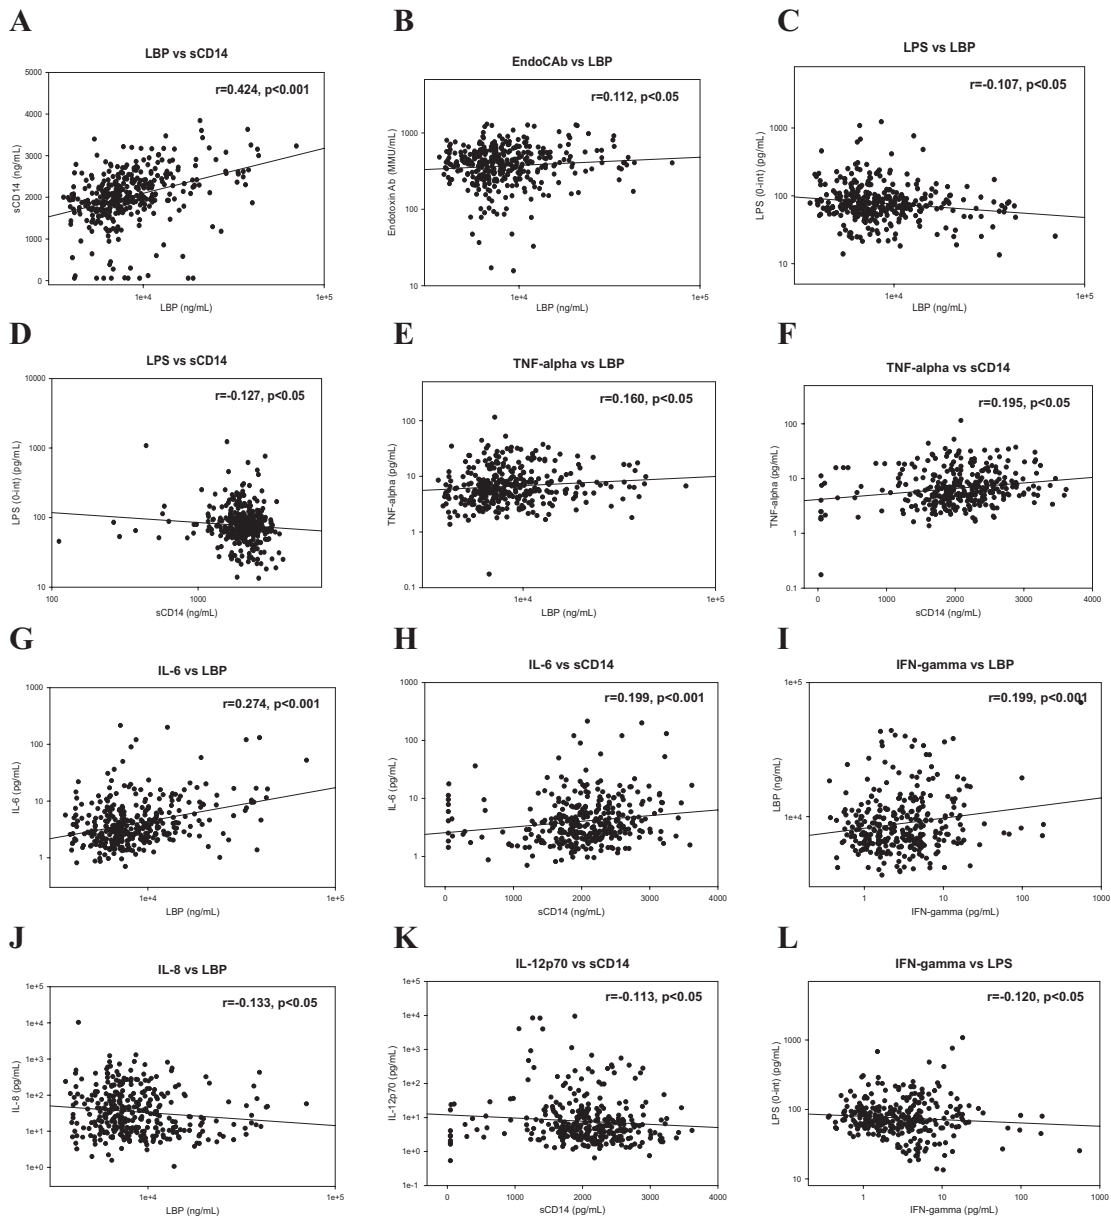

**Fig. S3.** Significant correlations of microbial translocation markers and inflammatory cytokine levels. Comparisons of (A) LBP and sCD14 levels ( $r = 0.424$ ,  $P < .001$ ), (B) sCD14 and endoCAb ( $r = 0.112$ ,  $P < .05$ ), (C) LPS and LBP ( $r = -0.103$ ,  $P < .05$ ), (D) LPS and sCD14 ( $r = -0.122$ ,  $P < .05$ ), (E) TNF- $\alpha$  and LBP ( $r = 0.16$ ,  $P < .01$ ), (F) TNF- $\alpha$  and sCD14 ( $r = 0.195$ ,  $P < .001$ ), (G) IL-6 and LBP ( $r = 0.274$ ,  $P < .001$ ), (H) IL-6 and sCD14 ( $r = 0.199$ ,  $P < .001$ ), (I) IFN- $\gamma$  and LBP ( $r = 0.199$ ,  $P < .001$ ), (J) IL-8 and LBP ( $r = -0.133$ ,  $P < .05$ ), (K) IL-12p70 and sCD14 ( $r = -0.113$ ,  $P < .05$ ), and (L) IFN- $\gamma$  and LPS ( $r = -0.120$ ,  $P < .05$ ) were calculated using Spearman's rank-order analysis.

**Table S1. Correlation coefficients (*r*) for all cytokines and microbial translocation markers with corresponding *P* values and numbers of patient samples tested**

|                                | TNF- $\alpha$  | IL-8           | IL-6         | IL-2         | IL-1 $\beta$ | IL-12 p70    | IL-10        | IFN- $\gamma$ | GM-CSF  | sCD14         | LBP          | EndoCAb |
|--------------------------------|----------------|----------------|--------------|--------------|--------------|--------------|--------------|---------------|---------|---------------|--------------|---------|
| <b>LPS</b>                     |                |                |              |              |              |              |              |               |         |               |              |         |
| <i>r</i>                       | 0.0802         | -0.0147        | -0.044       | 0.0236       | 0.0152       | 0.0662       | -0.0221      | -0.12         | 0.0295  | -0.127        | -0.107       | 0.00597 |
| <i>P</i> value                 | 0.139          | 0.787          | 0.417        | 0.663        | 0.779        | 0.222        | 0.683        | <b>0.0269</b> | 0.587   | <b>0.0164</b> | <b>0.043</b> | 0.91    |
| <i>n</i>                       | 342            | 342            | 342          | 342          | 342          | 342          | 342          | 342           | 342     | 359           | 359          | 359     |
| <b>EndoCAb</b>                 |                |                |              |              |              |              |              |               |         |               |              |         |
| <i>r</i>                       | -0.0641        | -0.0654        | 0.0159       | 0.0221       | 0.000597     | -0.0729      | -0.058       | -0.0664       | -0.0543 | 0.112         | 0.0883       |         |
| <i>P</i> value                 | 0.237          | 0.227          | 0.77         | 0.684        | 0.991        | 0.178        | 0.284        | 0.22          | 0.317   | <b>0.0342</b> | 0.0938       |         |
| <i>n</i>                       | 342            | 342            | 342          | 342          | 342          | 342          | 342          | 342           | 342     | 361           | 361          |         |
| <b>LBP</b>                     |                |                |              |              |              |              |              |               |         |               |              |         |
| <i>r</i>                       | 0.16           | -0.133         | 0.274        | 0.0283       | 0.000394     | -0.0415      | 0.0982       | 0.199         | -0.0663 | 0.424         |              |         |
| <i>P</i> value                 | <b>0.00311</b> | <b>0.0138</b>  | <b>0.001</b> | 0.602        | 0.994        | 0.444        | 0.0697       | <b>0.001</b>  | 0.221   | <b>0.001</b>  |              |         |
| <i>n</i>                       | 342            | 342            | 342          | 342          | 342          | 342          | 342          | 342           | 342     | 361           |              |         |
| <b>sCD14</b>                   |                |                |              |              |              |              |              |               |         |               |              |         |
| <i>r</i>                       | 0.195          | -0.0355        | 0.199        | -0.037       | -0.03        | -0.113       | 0.0847       | 0.0633        | -0.0286 |               |              |         |
| <i>P</i> value                 | <b>0.001</b>   | 0.512          | <b>0.001</b> | 0.495        | 0.58         | <b>0.036</b> | 0.118        | 0.243         | 0.598   |               |              |         |
| <i>n</i>                       | 342            | 342            | 342          | 342          | 342          | 342          | 342          | 342           | 342     |               |              |         |
| <b>GM-CSF</b>                  |                |                |              |              |              |              |              |               |         |               |              |         |
| <i>r</i>                       | -0.0838        | 0.498          | 0.293        | 0.628        | 0.538        | 0.68         | 0.468        | 0.298         |         |               |              |         |
| <i>P</i> value                 | 0.121          | <b>0.001</b>   | <b>0.001</b> | <b>0.001</b> | <b>0.001</b> | <b>0.001</b> | <b>0.001</b> | <b>0.001</b>  |         |               |              |         |
| <i>n</i>                       | 344            | 344            | 344          | 344          | 344          | 344          | 344          | 344           |         |               |              |         |
| <b>IFN-<math>\gamma</math></b> |                |                |              |              |              |              |              |               |         |               |              |         |
| <i>r</i>                       | -0.0266        | 0.278          | 0.592        | 0.541        | 0.45         | 0.273        | 0.388        |               |         |               |              |         |
| <i>P</i> value                 | 0.622          | <b>0.001</b>   | <b>0.001</b> | <b>0.001</b> | <b>0.001</b> | <b>0.001</b> | <b>0.001</b> |               |         |               |              |         |
| <i>n</i>                       | 344            | 344            | 344          | 344          | 344          | 344          | 344          |               |         |               |              |         |
| <b>IL-10</b>                   |                |                |              |              |              |              |              |               |         |               |              |         |
| <i>r</i>                       | 0.169          | 0.14           | 0.283        | 0.309        | 0.237        | 0.476        |              |               |         |               |              |         |
| <i>P</i> value                 | <b>0.00165</b> | <b>0.00913</b> | <b>0.001</b> | <b>0.001</b> | <b>0.001</b> | <b>0.001</b> |              |               |         |               |              |         |
| <i>n</i>                       | 344            | 344            | 344          | 344          | 344          | 344          |              |               |         |               |              |         |
| <b>IL-12 p70</b>               |                |                |              |              |              |              |              |               |         |               |              |         |
| <i>r</i>                       | 0.247          | 0.416          | 0.194        | 0.493        | 0.436        |              |              |               |         |               |              |         |
| <i>P</i> value                 | <b>0.001</b>   | <b>0.001</b>   | <b>0.001</b> | <b>0.001</b> | <b>0.001</b> |              |              |               |         |               |              |         |
| <i>n</i>                       | 344            | 344            | 344          | 344          | 344          |              |              |               |         |               |              |         |
| <b>IL-1<math>\beta</math></b>  |                |                |              |              |              |              |              |               |         |               |              |         |
| <i>r</i>                       | 0.0662         | 0.544          | 0.575        | 0.725        |              |              |              |               |         |               |              |         |
| <i>P</i> value                 | 0.221          | <b>0.001</b>   | <b>0.001</b> | <b>0.001</b> |              |              |              |               |         |               |              |         |
| <i>n</i>                       | 344            | 344            | 344          | 344          |              |              |              |               |         |               |              |         |
| <b>IL-2</b>                    |                |                |              |              |              |              |              |               |         |               |              |         |
| <i>r</i>                       | -0.0324        | 0.592          | 0.588        |              |              |              |              |               |         |               |              |         |
| <i>P</i> value                 | 0.549          | <b>0.001</b>   | <b>0.001</b> |              |              |              |              |               |         |               |              |         |
| <i>n</i>                       | 344            | 344            | 344          |              |              |              |              |               |         |               |              |         |
| <b>IL-6</b>                    |                |                |              |              |              |              |              |               |         |               |              |         |
| <i>r</i>                       | 0.167          | 0.348          |              |              |              |              |              |               |         |               |              |         |
| <i>P</i> value                 | <b>0.00197</b> | <b>0.001</b>   |              |              |              |              |              |               |         |               |              |         |
| <i>n</i>                       | 344            | 344            |              |              |              |              |              |               |         |               |              |         |
| <b>IL-8</b>                    |                |                |              |              |              |              |              |               |         |               |              |         |
| <i>r</i>                       | 0.133          |                |              |              |              |              |              |               |         |               |              |         |
| <i>P</i> value                 | <b>0.0135</b>  |                |              |              |              |              |              |               |         |               |              |         |
| <i>n</i>                       | 344            |                |              |              |              |              |              |               |         |               |              |         |

Significant associations are shown in bold ( $P < 0.05$ , Spearman's rank-order correlation).
